# Supplementary material
Source: publisher figshare collection journal article supplement (https://acs.figshare.com/ndownloader/files/34981971)
Supplement: Supplementary file 1 [file 34981971]

# The Pore Size of 3D-Printed PCL/PEG/Hydroxyapatite Scaffolds Affects Bone Regeneration by Modulating Macrophage Polarization and the Foreign Body Response

Wenfeng Li<sup>a1</sup>, Fang Dai<sup>a,b</sup>, Shan Zhang<sup>e</sup>, Fancheng Xu<sup>a</sup>, Zhiyong Xu<sup>d</sup>, Shousheng Liao<sup>c</sup>, Liangtao Zeng<sup>c</sup>, Li Song<sup>a,b\*</sup>, Fanrong Ai<sup>e,f\*</sup>

a. The Department of Stomatology, the Second Affiliated Hospital of Nanchang University, Nanchang, China

b. The Institute of Periodontal Disease, Nanchang University, Nanchang, China

c. The Department of Pathology, the Second Affiliated Hospital of Nanchang University, Nanchang, China

d. School of Pharmacy, Nanchang University, Nanchang, China

e. School of Mechatronics Engineering, Nanchang University, Nanchang, China

f. Nanchang Municipal Key Laboratory of 3D Bioprinting Technology and Equipment, Nanchang, China

## Figures

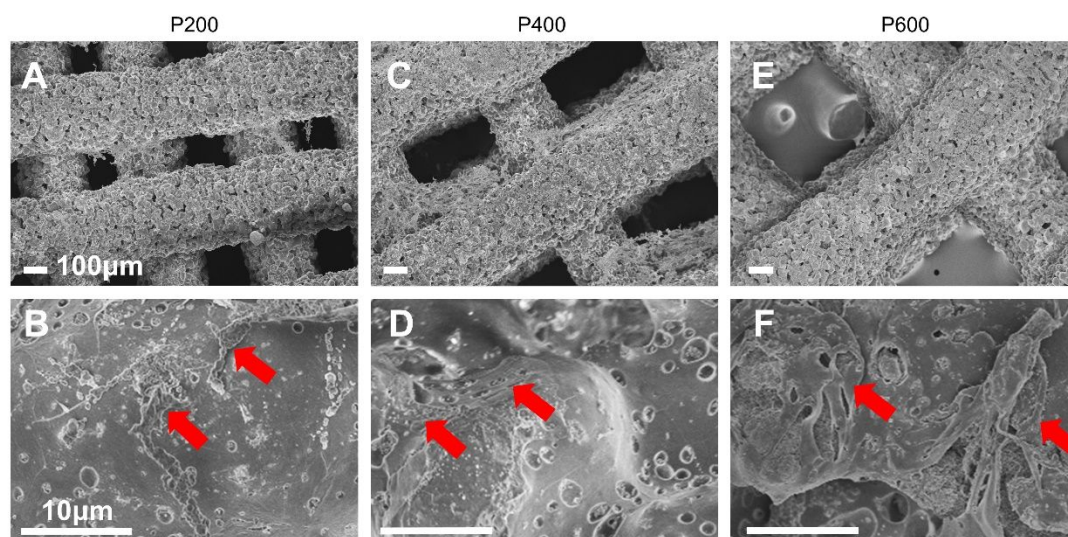

**Figure S1** | SEM observations of RAW 264.7 cell behavior in contact with 3D-printed scaffolds with different pore sizes at 3 days. **(A-B)** P200 scaffold. **(C-D)** P400 scaffold. **(E-F)**

P600 scaffold. Red arrow-RAW 264.7 cell.

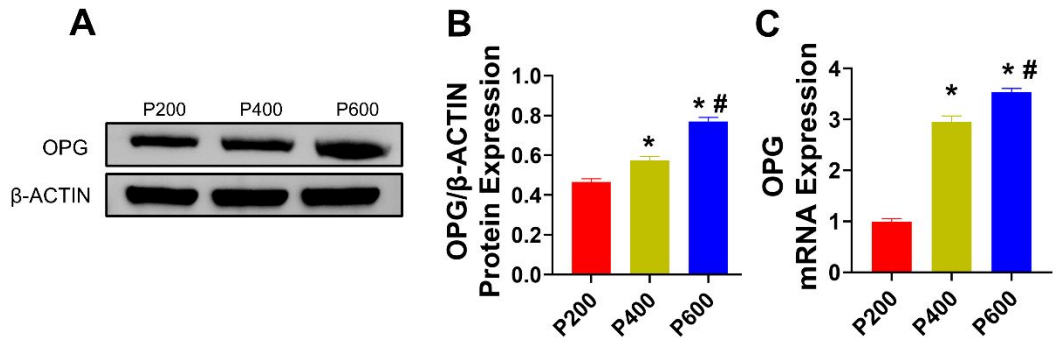

**Figure S2** | Expression of OPG proteins (**A**) and quantified in column diagram (**B**) expression of OPG mRNA (**C**). \* Different from P200 ( $P < 0.05$ ) # Different from P400 ( $P < 0.05$ ).

**Table S1.**

The primers sequences used in qRT-PCR

| Gene  |         | Sequence (5'-3')        |
|-------|---------|-------------------------|
| OPG   | Forward | CCCTTGCCCTGACCACTCTTAT  |
|       | Reverse | AGGGTGCTTTCGATGAAGTCTCA |
| GAPDH | Forward | CCTCGTCCCGTAGACAAAATG   |
|       | Reverse | TGAGGTCAATGAAGGGGTCGT   |
